# Supplementary material for: Complex Transposon Insertion as a Novel Cause of Pompe Disease
Source: MDPI journal article supplement (doi:10.3390/ijms221910887), 2021-10-08
Supplement: s1 [file s1]

### Amplification of the *GAA* cDNA:

c1F-ATGAGGCAGCAGGTAGGACAG  
c1R-AACTGGTCCGCAAAGAACAG  
c2F-CACCGTCCCCACTCTACAG  
c2R-TGGAAGTCAGCCACCATGTC  
c3F-GCCGCTGATTGGGAAGGTAT  
c3R-GTCTGCAGGTCGTACCATGT  
c4F-ACTCCTCCCCCACCTCTACA  
c4R-ACTGCTCTCCCATCAACAGC

### qPCR for the *GAA* expression:

exons 3-4:

q3F-CACCGTCCCCACTCTACAG  
q3R-AACTGGTCCGCAAAGAACAG

exons 15-16:

q15F-ACTCCTCCCCCACCTCTACA  
q16R-GGTCCACAGTCCAGGTGCTA

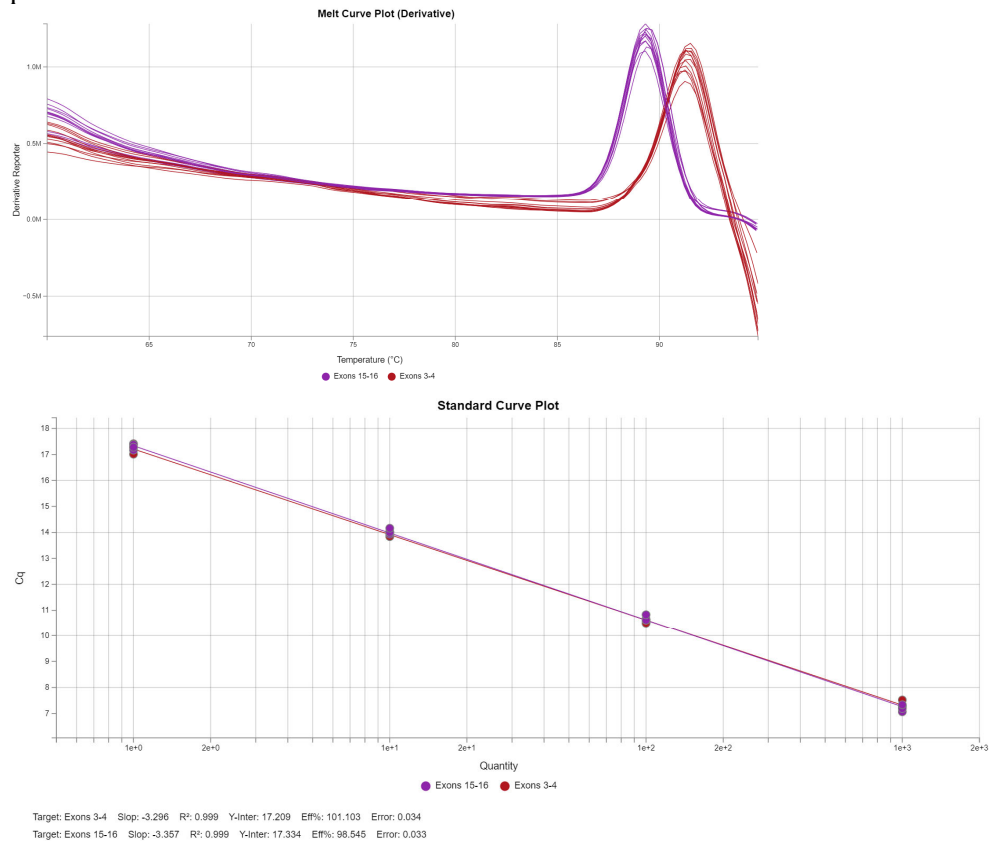

### qPCR for the chimeric mRNA isoform expression:

GAA exons 14-15:

q14F-CGACGTCTGCGGCTTCCT  
q15R-CCTGGGGCAGACTGAGCA

GAA exon 15-TE:

q15F-CTCTACACACTGTTCCACCAGG

TP5`R-TGAGGCAGGAGAATCAGGCA

TE 3`:

TP3`F-CCTCTCTAAACCAAGAGACCAC

TP3`R-GTTCAATTTGCCATTGTCCAGG

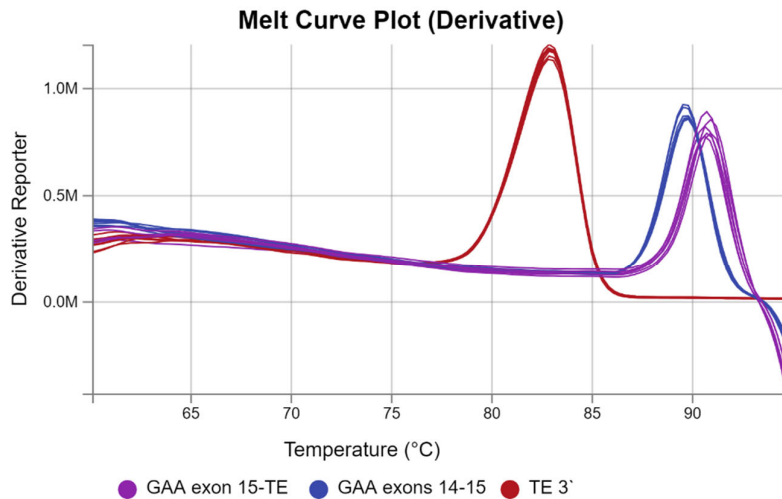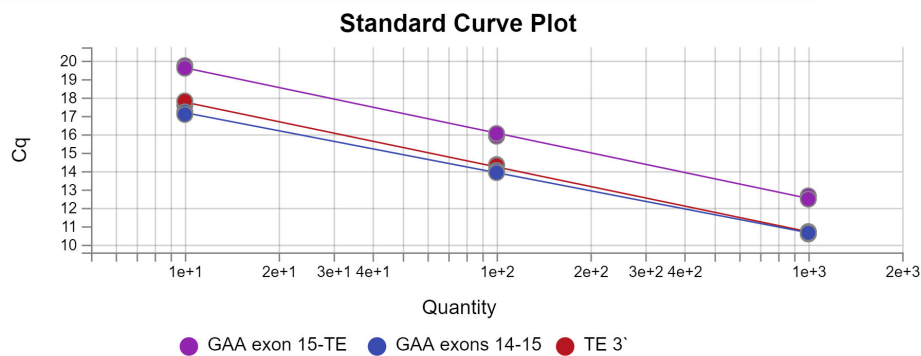

Target: TE 3' Slope: -3.524 R<sup>2</sup>: 0.999 Y-Inter: 21.271 Eff%: 92.217 Error: 0.053

Target: GAA exon 15-TE Slope: -3.55 R<sup>2</sup>: 0.999 Y-Inter: 23.164 Eff%: 91.296 Error: 0.062

Target: GAA exons 14-15 Slope: -3.263 R<sup>2</sup>: 0.999 Y-Inter: 20.439 Eff%: 102.503 Error: 0.035

### qPCR for the *GAA* expression:

EIF4A3q\_F-TGGCCCAGACATCTGTAGAAA  
EIF4A3q\_R-AGAAAGAGCGGGAGTCCAT

### Bisulfite sequencing of *GAA*:

exon 1:

bis1F-GATTTTTTAAATGTTGGTTGTTTT  
bis1R-AACTAAAAATCTAAACTCAAACCTCC  
bis1.2F-TTTTGGGAATAATTGTGAGTTATGGAGTATA  
bis1.2R-CCTCAACTTCCCAACTAAAAAACC

exon 3-4:

bis3F-TTGGATTAGGATTATTTTGTGGAAT  
bis4R-CTCCAATCTCCAAAACAAACAACAC

5' of intron 15:

bis15.1F-TGGTTTAGATAGAGGTAATTGTGTT  
bis15.1R-ACCTACTAAATAAATAAAAAACCCC

3' of intron 15:

bis15.2F-TAGGAAATAGGATAGGGTAGAGTTG  
bis15.2R-ATTCCAACAAATAAAAATCAATACC

### Gene specific primers for RACE:

Race1F-CCTACTGGGAAGTGAGGAAAC  
Race2F-TTACTGTGCAAGCTGGGATT  
Race3F-CCTTTCAAGACCTAGTTTACTAAC

**Consensus sequence of the TE amplicon**

TCCCGTCTCCCTCTCCCTCTCCCGTCTCCCTCTCCCTCTCCCGTCTCCCTCTCCCTCTC  
CCGNNNNNNNNNNCCCTCTCCCTCTCCCTCTCCCTCTCCCTCTCCCTCTCCCTCTCCCT  
CTCCCTCTCCGTCTCCGTCTCCGTCTCCCGTCTCCCTCCACGGTCTCCCTCTCAAGCC  
GAGCCAAAGCTGGACGGTACTGCTGCCATCTCGGCTCACTGCAACCTCCCTGCCTGA  
TTCTCCTGCCTCAGCCTGCCGAGTGCTGCGATTGCAGGCACGCGCCGCCACGCCTG  
ACTGGTTTTTCGGTTTTTTTTTTTGGTGGAGATGGGGTTTCGCTGTGTTGGCCGGGCTGCT  
CTCCAGCTCCTAACCGCGAGTGATCCGCCAGCCTCGGCCTCCCGAGGTGCCGGGATT  
GCAGATGAAGTCTCGTTCACTCAGTGCTCAATGGTGCCAGGCTGGAGTGCAGTGGC  
GTGATCTCGGCTCNCTNCAANCTCCACCTCCCAGCCGCCTGCCTTGGCCTCCCAAAG  
AGCCGAGATTGCAGCCTCTGCCCCGCCGCCACCCCGTCTGGGAAGTGAGGAGCGTC  
TCTGCTTGGCCACCCATCGTCTGGGATATGAGGAGCCCCCTCTGCCTGGCTGCCCAGT  
GTGAAAGTGAGGAGCGTCTCTGCCCCGCCGCCATCCCATCTAGGAAGCGAGAAGC  
GCCTCTTCCCCGCCGCCATCCCATCTAGGAAGTGAGGAGCGTCTCTGCCCCGCCGCC  
CATCGTCTGAGATGTGGGGAGCACCTCTGCCCCACCGCCCTGTCTGGGATGTGAGGA  
GCGCCTCTGCTGGGCCGCAACCCTGTCTGGGAGGTGAGGAGTGTCTCTGCCCCGCCGCC  
CTCCGTCTGAGAAGTGAGGAAACCCTCTGCCTGGCAACCGCCCCGTCTGAGAAGTG  
AGGAGCCCCCTCCGTCTGGCAACCAACCCGTCTGGGAAGTGAGGAGCGTCTCCGCC  
GGCAGCCACCCCGTCCGGGAGGGAGGTGGGGGGGGTTCAGCCCCCGCCCGGCCAGC  
CGCCCCGTCCGGGAGGTGAGGGGCTCCTCTGCCCCGCCGCCCTACTGGGAAGTGA  
GGAGCCCCCTCTGCCCCGCCAGCCGCCCGTCCGGGAGGGAGGTGGGGGGGTTCAGCC  
CCCCGCCCGGCCGCCGCCCGTCCGGGAGGTGAGGGGCGCCTCTGCCCCGCCGCC  
CCTACTGGGAAGTGAGGACCCCTCTGCCCCGCCAGTCGCCCCGTCCAGGAGGGAGG  
TGGGGGGGTCAACCCCCCGCCCGGCCAGCCGCCAGTCCGGGAGGGAGGTGGGGGG  
TCAGCCCCCGCCTGGCCAGCCGCCCGTCCGGGAGGTGAGGGGCGCCTCTGCCCC  
GCCGCCCTACTGGGAAGTGAGGAGCCCTCTGCCCCGCCAGCCGCCCGCCAGG  
AGGGAGGTGGGGGGGTTCAGCCCCCGCCTGGCCAGCCGCCCATCCGGGAGGGAGG  
TGGGGGGGTTCAGCCCCCGCCCGGCCAGCCGCCNCGTCCGGGAGGGGGGAGGGGG  
GGTCAGCCCCCTGCCCCGCCAGCCGCCCGTCCGGGAGGGAGGTGGGGGGGGTTCAG  
CCCCCTGCCTGGCCAGCCGCCCGTCCGGGAGGTGAGGGGCGCCTCTGCCCCGCCGCC  
CCCCTACTGGGAAGTGAGGACCCCTCTGCCCCGCCAGCCGCCCGTCCGGGAGGGA  
GGTGGGGGGGGTTCAGCACCCCGCCCGGCCAGCCGCCCGTCCGGGAGGGAGGTGGG  
GGGATCAGCCCCCTGCCTGGCCAGCCGCCCGTCCGGGAGGTGAGGGGCGCCTCTG  
CCCGGCCGCCCTACTGGGAAGTGAGANACCCTCTGCCCCGCCAGCCGCCCGTCC  
GGGAGGGAGGTGGGGGGGGTTCAGCACCCCGCCCGGCCAGCCGCCCGTCCGGGAG  
GGAGGTGGGGGGNTCAGCCCCCTGCCTGGCCAGCCGCCCGTCCGGGAGGTGAGGG  
GCGCCTCTGCCCCGCCGCCCTACTGGGAAGTGAGGACCCCTCTGCCCCGCCAGCCG  
CCCTGTCCGGGAGGGAGGTGGGGGGGAACAGCCCCCGCCCGGCCAGCCGCCCTATC  
CAGGAGGTGAGGGGCGCCTCTGCCCCGCCGCCCTACTGGGAAGTGAGGAGCCCT  
CTGCCTGGCCAGCCGCCCGTCCGGGAGGGCGGTGGGGGGGTTCAGCCCCCGCCCG  
GCCAGCCGCCCATCTGGGAGGTGAGGGGCACTTCTGCCGGGCCGCCCTACTGGG  
AAGTGAGGAGCCCTCTGCCCCGCCACGACCCCGTCTGGGAGGTGTGCCAGCGGC  
TCATTGGGGATGGGCCATGATGACAATGGCGGTTTTGTGGAATAGAAAGGCGGGAA  
GGGTGGGGAAAAAATTGAGAAATCGGATGGTTGCTGGGTCTGTGTGGATAGAAGTA

[illegible]
