# Supplementary figures and images for: Complex Transposon Insertion as a Novel Cause of Pompe Disease
Source: MDPI journal article supplement (doi:10.3390/ijms221910887), 2021-10-08

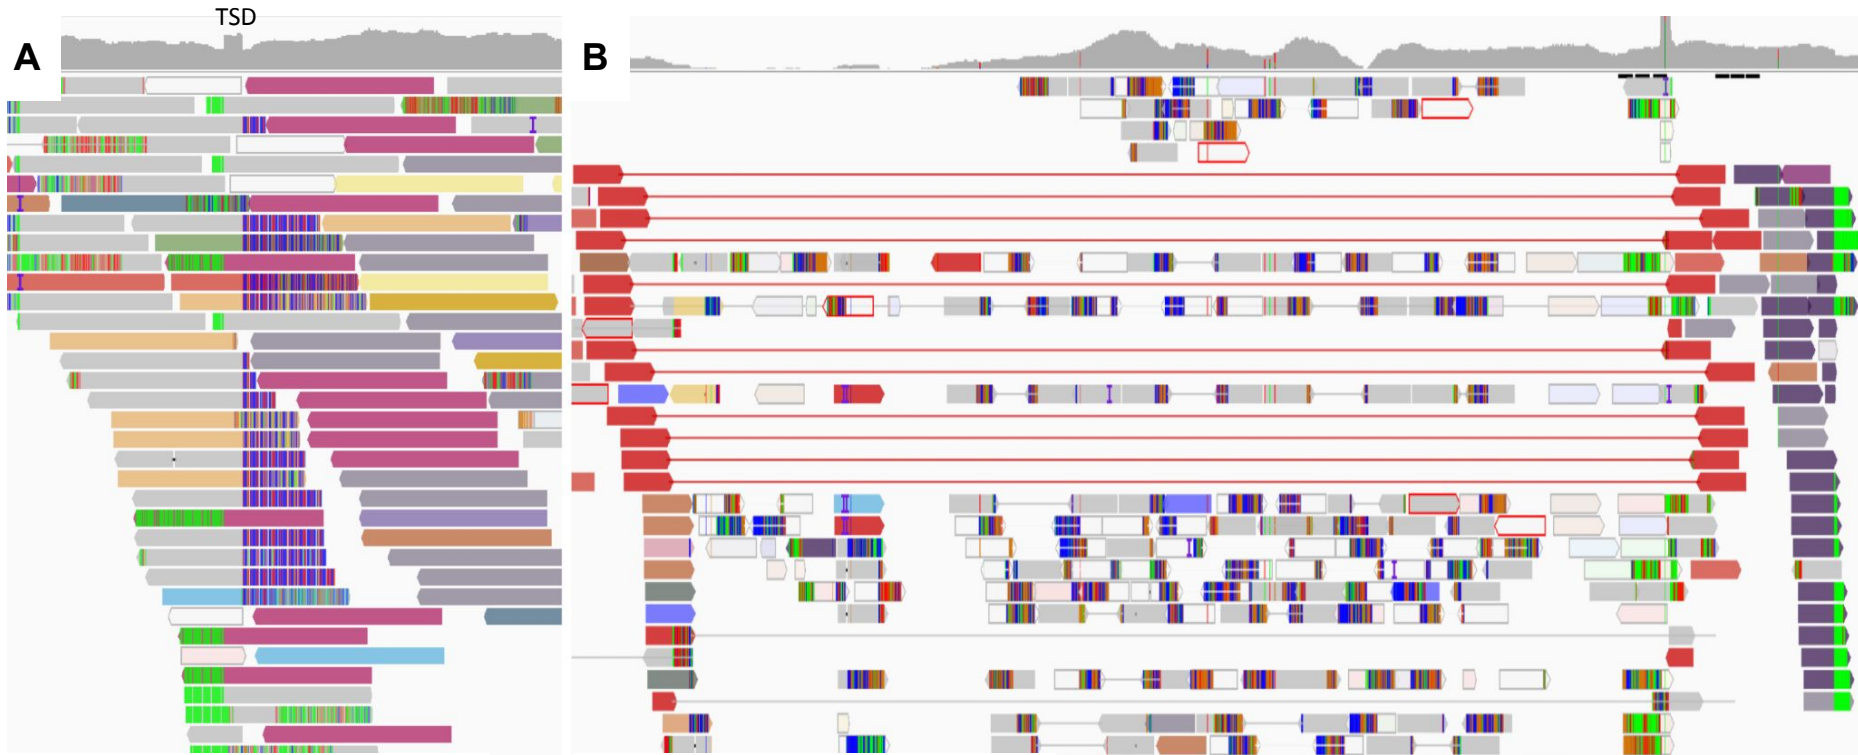

NC\_000017.11:80,114,000-80,114,447

NC\_000020.11:2,822,193-2,826,397

**C**

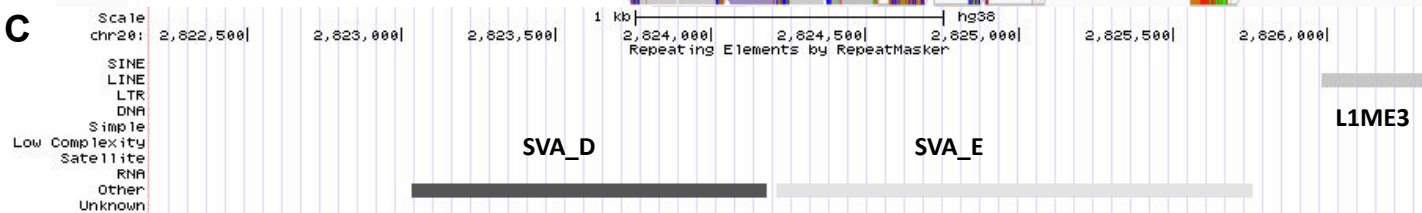

**D**

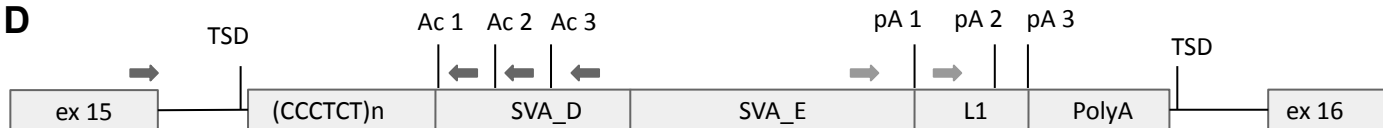

**E**

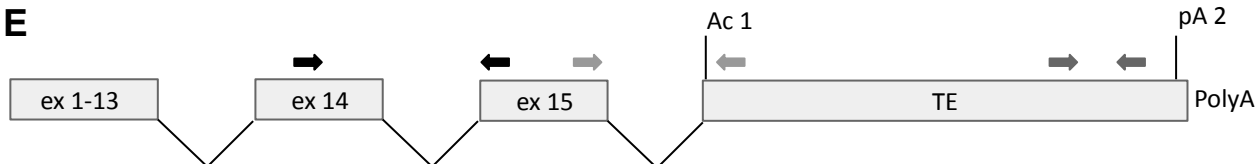

**F**

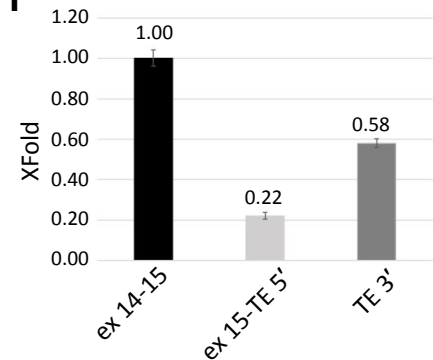

Supplement: s1 [file s1]

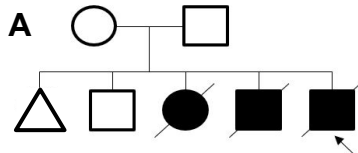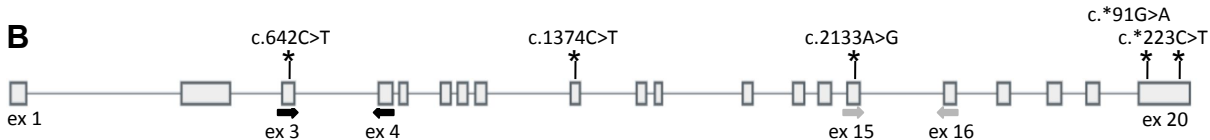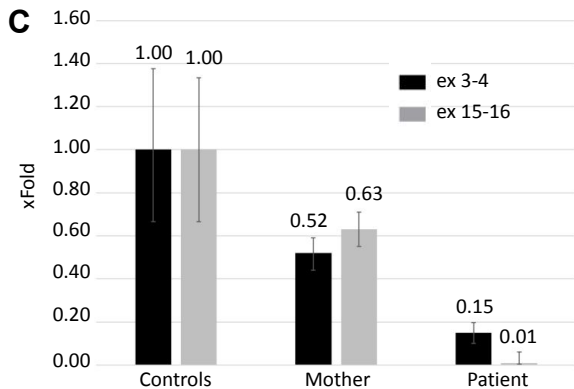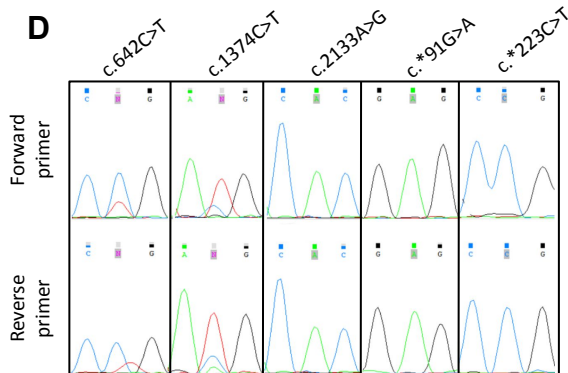

Supplement: s1 [file s1]
